# Supplementary material for: Long-term decline in grassland productivity driven by increasing dryness
Source: PubMed Central journal article supplement (PMC4479003; doi:10.1038/ncomms8148), 2015-05-14
Supplement: ncomms8148-s1.pdf [file ncomms8148-s1.pdf]

## Supplementary Figure 1

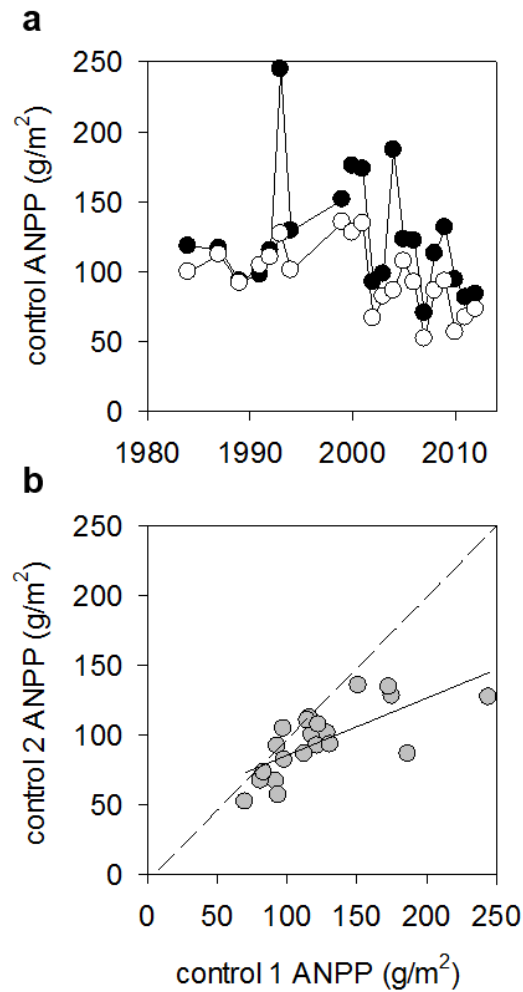

### Supplementary Fig. 1 | Similarity of long-term patterns in ANPP between control plots 1

**(black symbols) and 2 (open symbols).** (a) Both control areas show significant decline ( $p < 0.02$ , linear regression,  $n=21$ ) over time. (b) Simple regression between these two plots shows significant ( $p < 0.001$ ,  $n = 21$ ) positive temporal correspondence but overall slightly lower ANPP in control plot 2 (dashed line is 1:1) and a shallower slope driven by two high-productivity years in control 1.

## Supplementary Figure 2

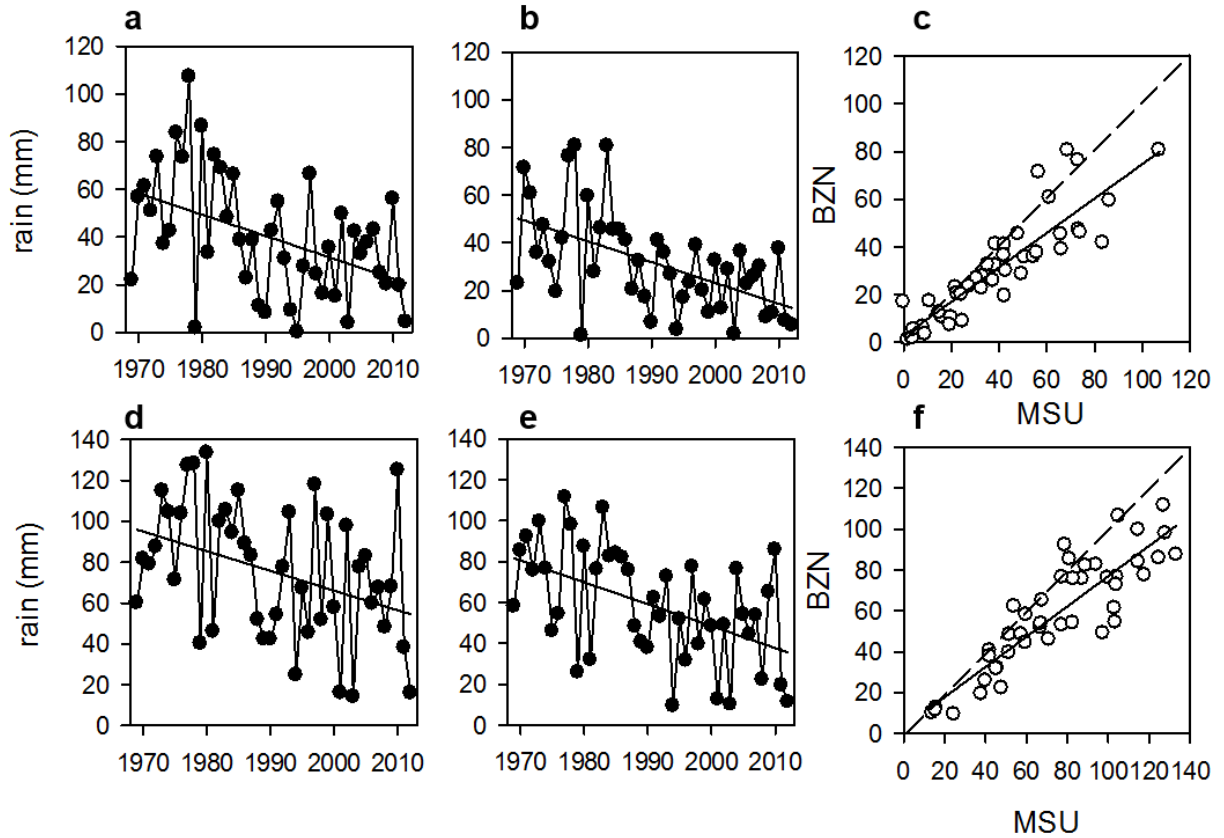

**Supplementary Fig. 2** | Long term decline in September (a and b) and combined August and September rainfall (d and e) recorded at Montana State University (MSU; a and d) and Bozeman Yellowstone International Airport (BZN; b and e). Rainfall recorded at these stations is highly correlated ( $p < 0.001$ ,  $n = 44$ ) but is generally higher at MSU (c, e).

### Supplementary Figure 3

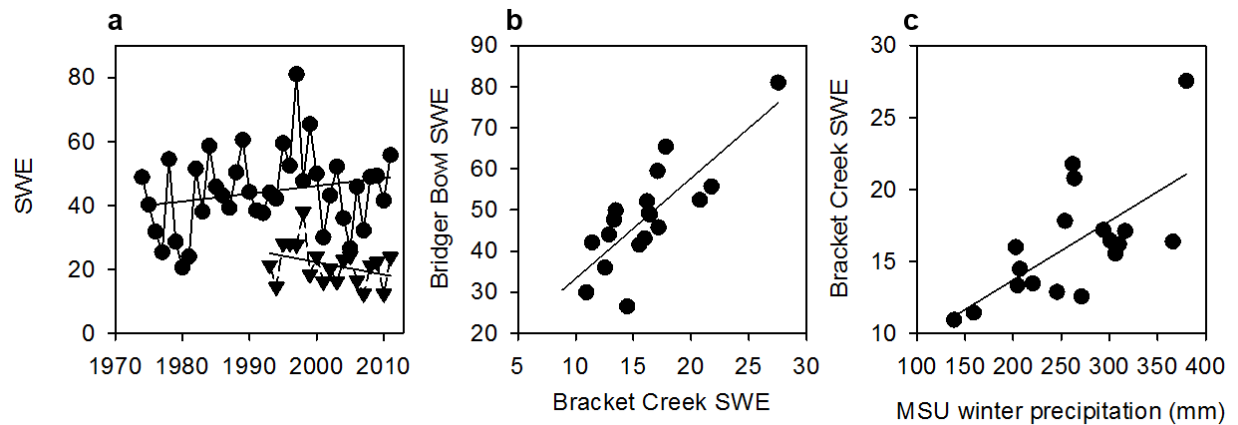

**Supplementary Fig. 3 | Time series of maximum snow water equivalent (SWE) and winter precipitation.** (a) SWE (cm) measured at Bridger Bowl (circles) and Bracket Creek SNOTEL (triangles) stations. (b) These stations show significant ( $p < 0.001$ , linear regression,  $n = 18$ ) temporal correspondence with each other and (c) snowfall recorded at MSU, indicating strong regional coherence in winter precipitation.

### Supplementary Figure 4

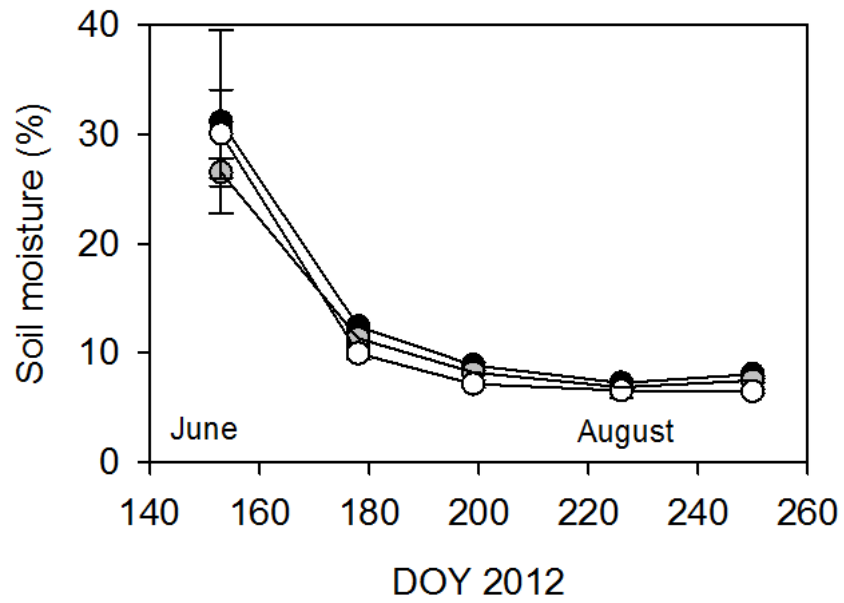

**Supplementary Fig. 4 |** Gravimetric soil moisture measured in shallow soils (0 -15 cm) as a function of day of the year (DOY) in the control (black symbols) and experimental x2-snow (grey) and x4-snow (open) plots in summer 2012. Error bars are 1SE around the mean ( $n = 5$ ).

**Supplementary Figure 5**

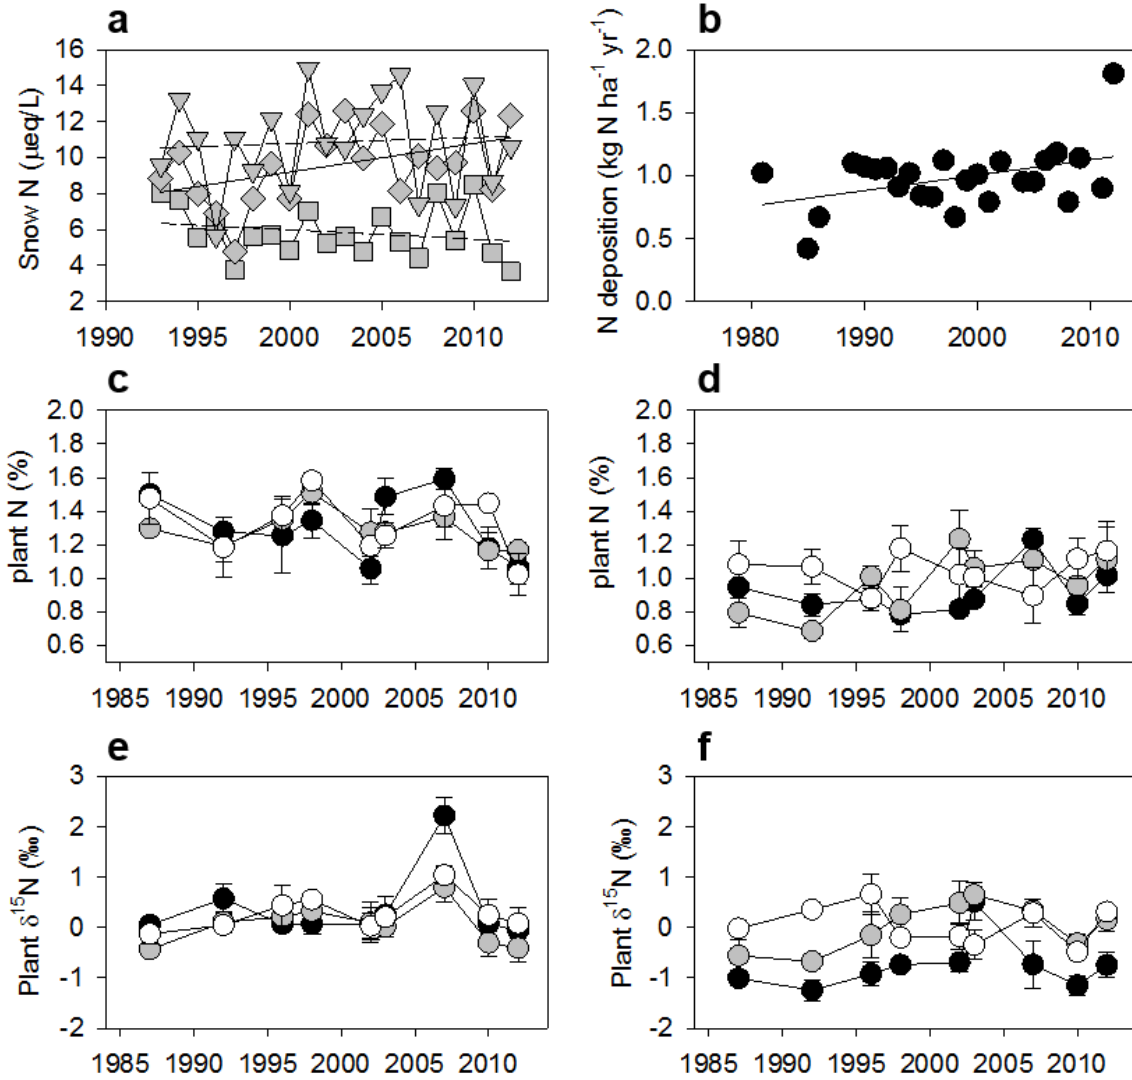

**Supplementary Fig. 5 | Time series of N inputs in precipitation and snowpack and N contents and isotopic signatures in plant biomass.** (a) N in regional snowpack and (b) atmospheric N deposition and (c and d) N contents and (e and f)  $^{15}\text{N}$  composition in aboveground biomass of forbs (c and e) and grasses (d and f) across control (black symbols), x2-snow (grey symbols) and x4-snow (open symbols) plots. In (a) data from Daisy Pass (diamond symbols) showed a

significant ( $P = 0.048$ ) but small positive trend. Regressions for Big Sky (squares) and Red Mountain (triangles) were not significant ( $P > 0.3$ ). Atmospheric N deposition is low but increased significantly ( $p = 0.037$ , linear regression,  $n = 22$ ) at the Yellowstone NADP site. However, this relationship is rendered insignificant ( $p = 0.2$ ) after omitting the 2012 value. There were no significant temporal trends in N contents or  $^{15}\text{N}$  across functional groups and experimental treatments. Error bars are  $\pm 1$  SE.
